# Supplementary material for: Tailoring the hydrophobicity and zincophilicity of poly(ionic liquid) solid–electrolyte interphases for ultra-stable aqueous zinc batteries
Source: Royal Society of Chemistry journal article supplement (doi:10.1039/d3gc02916f), 2023-01-01
Supplement: d3gc02916f1.pdf [file d3gc02916f1.pdf]

## Supporting Information

### Tailoring the Hydrophobicity and Zincophilicity of Poly(ionic liquid)s Solid-electrolyte Interphases for Ultra-stable Aqueous Zinc Batteries

#### 1. Experimental Details

##### *Synthesis of 3-(1-vinyl-3-imidazolium) propanesulfonate (VIPS)*

[VIPS] was synthesized using a previously reported method.<sup>1, 2</sup> 9.41 g 1-vinylimidazole (99%, Aladdin) was dissolved in 60 mL of acetone. Then an equimolar amount of 1,3-propanesultone (99%, Aladdin) dissolved in 40 mL of acetone was added dropwise to the above solution at 0 °C under a nitrogen atmosphere. After stirred for 3 days at room temperature, the resultant solid was filtered and washed with acetone at least three times. Finally, the obtained VIPS was dried under vacuum at room temperature.

##### *Synthesis of 3-(1-vinyl-3-imidazolium) propanesulfonate ([VIPS][Zn(TFSI)<sub>2</sub>])*

Zn(TFSI)<sub>2</sub> was bound to [VIPS] via electrostatic interaction between -SO<sub>3</sub><sup>-</sup> and Zn<sup>2+</sup> to synthesize [PVIPS][Zn(TFSI)<sub>2</sub>]. 3-(1-vinyl-3-imidazolium) propanesulfonate (VIPS) and Zn(TFSI)<sub>2</sub> (98%, Aladdin) was dissolved in moderate amounts of methanol respectively. Then the solution with Zn(TFSI)<sub>2</sub> was slowly dripped into VIPS solution using a constant pressure drip funnel at room temperature. After stirring for 24 h, vacuum spin steam and place in vacuum drying oven for 72 h. [VIPS][Zn(TFO)<sub>2</sub>] and [VIPS][Zn(BF<sub>4</sub>)<sub>2</sub>] were synthesized by replacing Zn(TFSI)<sub>2</sub> with Zn(TFO)<sub>2</sub> (98%, Aladdin) and Zn(BF<sub>4</sub>)<sub>2</sub> (98%, Aladdin) in the same way.

##### *Preparation of casting solution*

3wt% PIL monomer, 1wt% crosslink PEGDA, and 0.1wt% photoinitiator E1173 were dissolved in methanol to obtain the casting solution.

##### *Preparation of [PVIPS][Zn(TFSI)<sub>2</sub>]/Zn and [PVBIm][TFSI]/Zn electrodes*

The casting solution was dripped onto the zinc foil (about 88.50μL·cm<sup>-2</sup>) and polymerized 40 min under 365 nm ultraviolet light. Then the coated zinc foil was kept at room temperature for 2 h to completely volatilize the solvent and get the [PVIPS][Zn(TFSI)<sub>2</sub>]/Zn and [PVBIm][TFSI]/Zn electrodes.

##### *Preparation of polyaniline (PANI) cathodes*

Cathodes were prepared in N-methylpyrrolidone (NMP, 99%, J&K Scientific) by mixing polyaniline (98%, Macklin), polyvinylidene fluoride (PVDF, Aladdin), acetylene black, carbon nanotube (CNT, 95%, Aladdin) (7:1:1:1 by weight). The slurry was rolled and pressed onto the carbon paper, followed by drying in a vacuum oven at 80 °C overnight. The mass loading of PANI in the cathode was ~1.7 mg·cm<sup>-2</sup>.

### ***Material Characterization***

Scanning Electron Microscopy (SEM) images were obtained using a scanning electron microscope (Gemini SEM300) operating at 10 kV using tungsten filament as the electron source. X-ray diffraction (XRD) patterns of the powders and membranes were obtained by a Rigaku SmartLab 9 kW X-ray diffractometer (Cu K $\alpha$  radiation). X-ray photoelectron spectroscopy (XPS) patterns were obtained by Thermo Scientific K-Alpha (Al K $\alpha$  radiation). Fourier transform infrared were tested by FT-IR (Bruker ALPHA II ). The wettability of the electrodes was studied by contact angle goniometer (Kruss DSA100S).

### ***Electrochemical measurements***

The electrochemical tests were evaluated using CR2032 coin cells assembled in the air using glass fiber separator. 2 M ZnSO<sub>4</sub> electrolyte was applied as electrolyte for all tests. For the symmetric cells, two pieces of bare Zn foils (or [PVIPS][Zn(TFSI)<sub>2</sub>]@Zn, [PVBIm][TFSI]@Zn) were served as electrodes. For the half cells, Ti foils were used as cathodes. For the full cells, the cathodes were replaced by PANI.

Galvanostatic charge-discharge tests were carried out on a LAND instrument (CT3002A). Electrochemical impedance spectra (EIS), chronoamperograms, cyclic voltammetry (CV), and linear polarization curves (LSV) were collected on an electrochemical analyzer (CHI 760D).

## 2. Supplementary figures

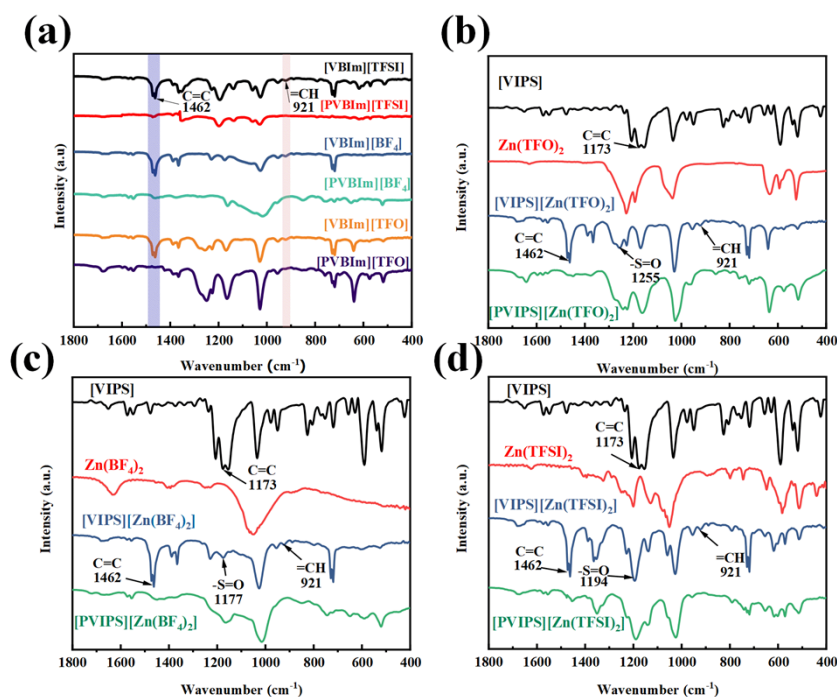

Figure S1. FTIR spectrum of (a) [VBIm][TFSI], [PVBIm][TFSI], [VBIm][BF<sub>4</sub>], [PVBIm][BF<sub>4</sub>], [VBIm][TFO], [PVBIm][TFO]; (b) VIPS, Zn(TFO)<sub>2</sub>, [VIPS][Zn(TFO)<sub>2</sub>], [PVIPS][Zn(TFO)<sub>2</sub>]; (c) VIPS, Zn(BF<sub>4</sub>)<sub>2</sub>, [VIPS][Zn(BF<sub>4</sub>)<sub>2</sub>], [PVIPS][Zn(BF<sub>4</sub>)<sub>2</sub>]; and (d) VIPS, Zn(TFSI)<sub>2</sub>, [VIPS][Zn(TFSI)<sub>2</sub>], [PVIPS][Zn(TFSI)<sub>2</sub>].

As shown in Figure S1a, it is evident that [VBIm][TFSI] displays distinct tensile stretching vibration at 1462 cm<sup>-1</sup> and =CH bending vibration at 921 cm<sup>-1</sup>. However, these peaks noticeably decrease on the zinc surface after in-situ polymerization. This observation substantiates that the hydrophobic layer predominantly comprises a polymer resulting from the breaking and polymerization of carbon-carbon double bonds within [VBIm][TFSI]. The structural diagram and molecular formula of the [PVBIm][TFSI] layer are depicted in Figure 1A. As for the construction of the [PVIPS][Zn(TFSI)<sub>2</sub>] layer, it involves two main steps. The initial step entails the formation of [VIPS][Zn(TFSI)<sub>2</sub>] via the interaction between the -SO<sub>3</sub><sup>-</sup> of VIPS and Zn<sup>2+</sup> from Zn(TFSI)<sub>2</sub>. The presence of C=C and =CH peaks in the infrared spectrum, along with the shift in the -S=O group, serves as evidence of successful synthesis. Subsequently, the [VIPS][Zn(TFSI)<sub>2</sub>] undergoes polymerization on the zinc surface to form [PVIPS][Zn(TFSI)<sub>2</sub>] layer. The absence of C=C and =CH signals in the coating conclusively verifies success polymerization of the SEI layer. The structure and composition of this [PVIPS][Zn(TFSI)<sub>2</sub>] layer are illustrated in Figure 1b.

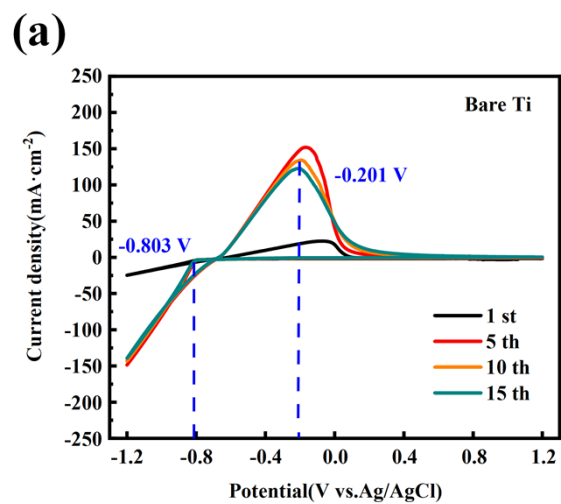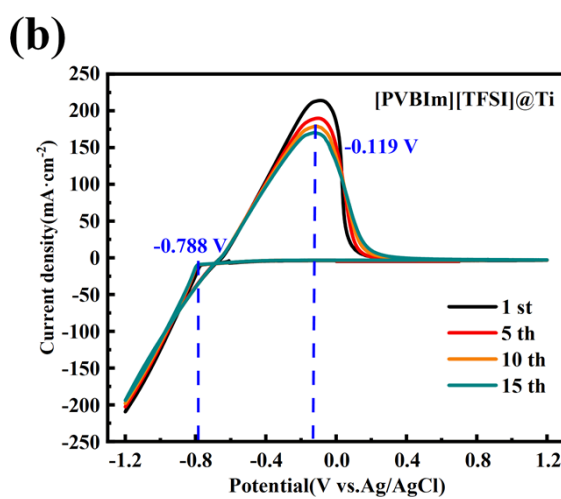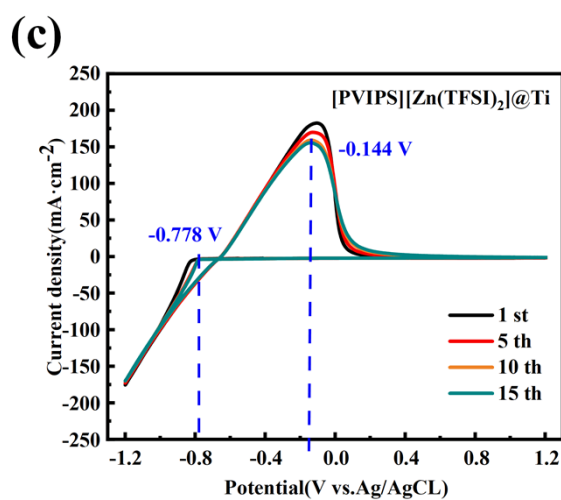

Figure S2. Cyclic voltammetry test in three-electrode system with (a) bare Ti, (b) [PVBIm][TFSI]@Ti, and (c) [PVIPS][Zn(TFSI)<sub>2</sub>]@Ti as working, Zn as counter, and Ag/AgCl as reference electrode at scan rate of  $50\text{ mV}\cdot\text{s}^{-1}$ .

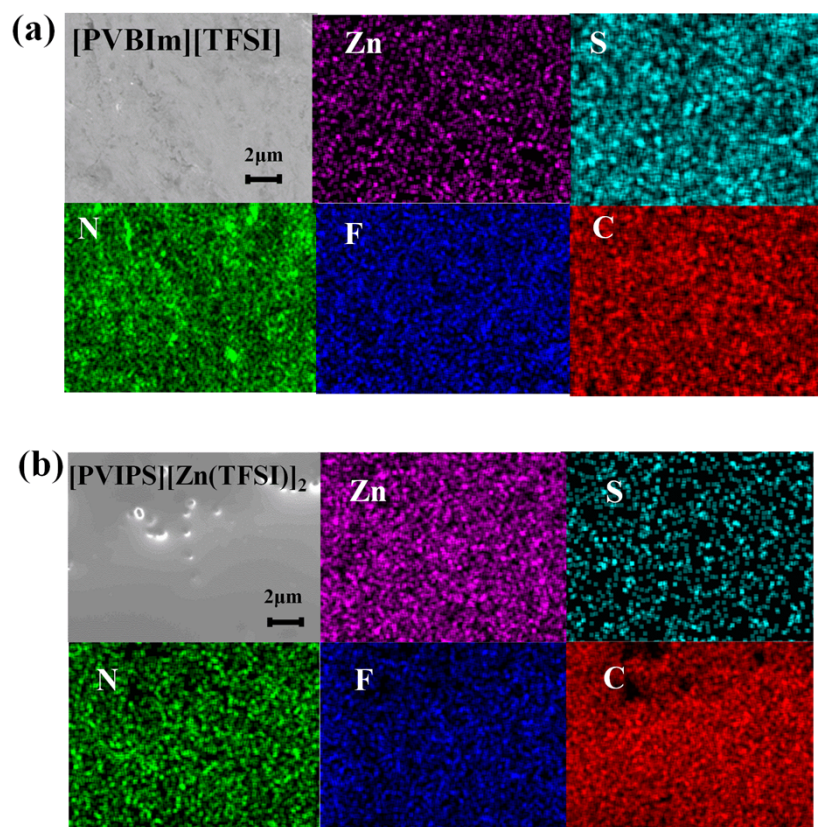

Figure S3. SEM images of (a) [PVBIm][TFSI]@Zn and (b) [PVIPS][Zn(TFSI)<sub>2</sub>]@Zn with corresponding EDS mapping results.

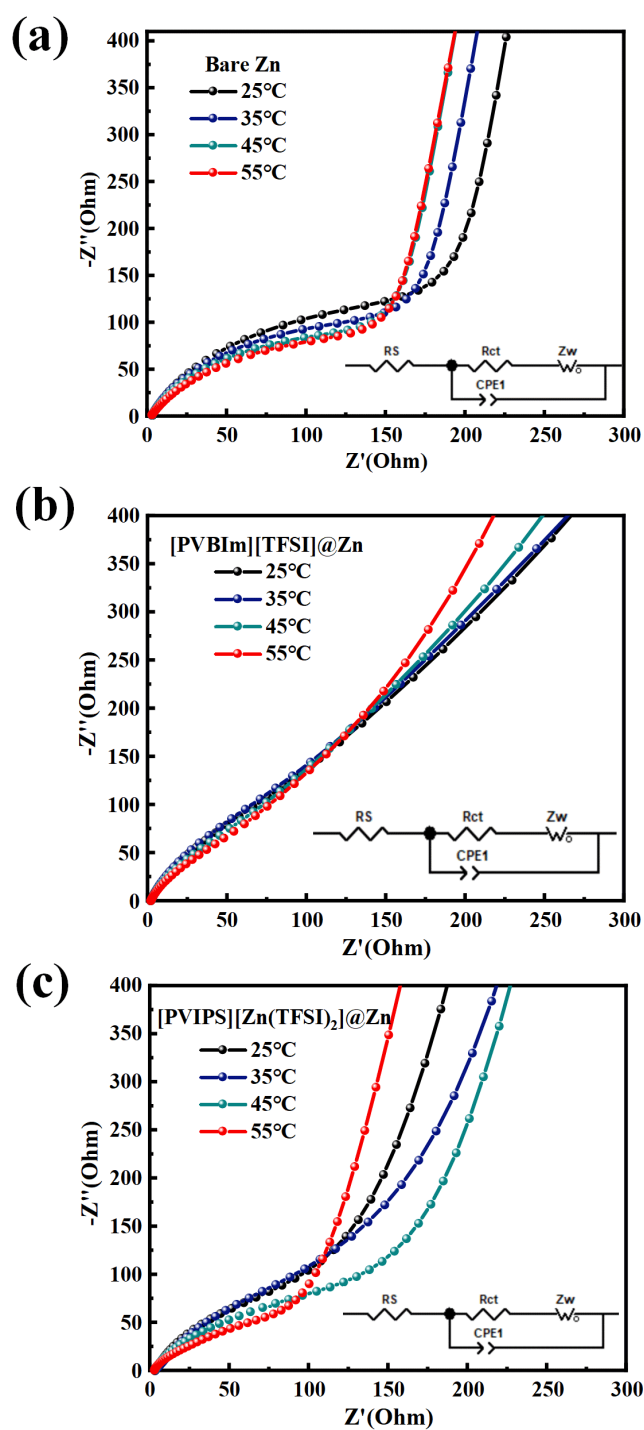

Figure S4. Nyquist plot of (a) Bare Zn, (b) [PVBIIm][TFSI]@Zn, and (c) [PVIPS][Zn(TFSI)<sub>2</sub>]@Zn symmetrical cells at

25°C-55°C.

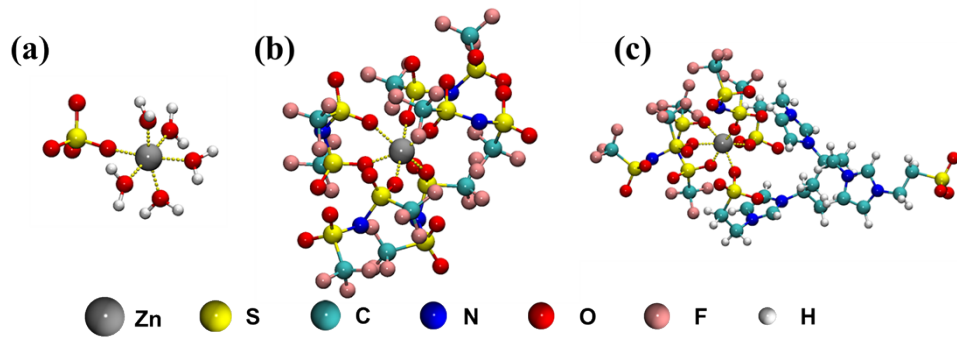

Figure S5. Schematic of the coordination structures of  $Zn^{2+}$  in (a)  $ZnSO_4$  aqueous electrolyte, (b) [PVBIIm][TFSI] SEI, and (c) [PVIPS][Zn(TFSI)<sub>2</sub>] SEI.

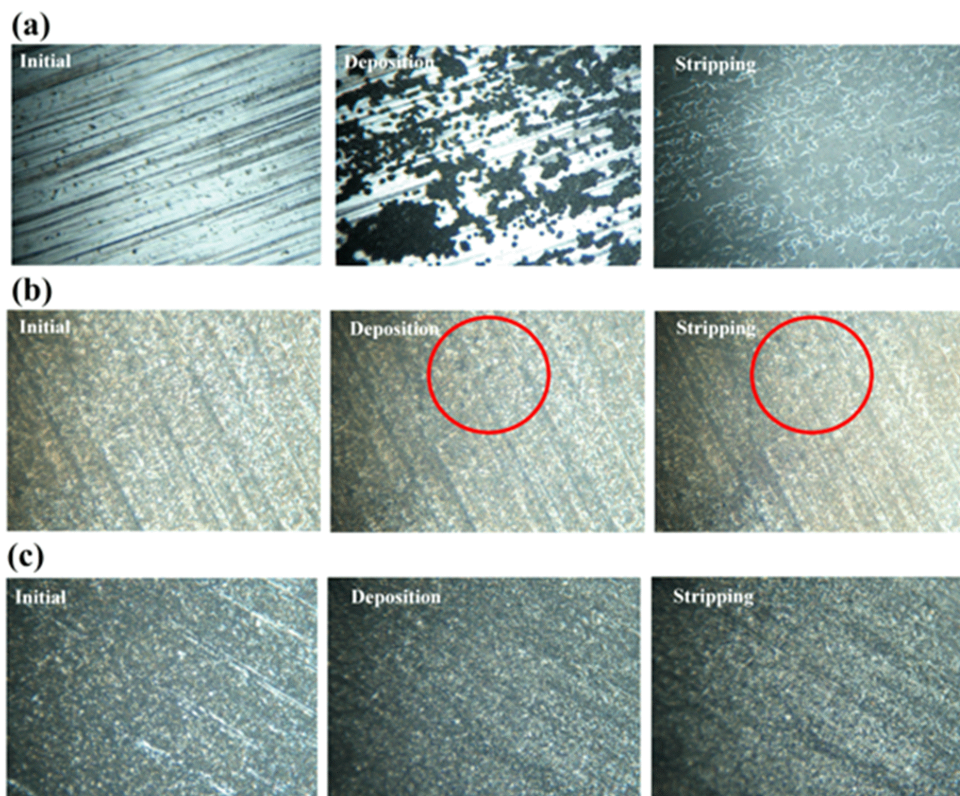

Figure S6. Top-view in-situ optical microscope observation of Zn plating/stripping processes for (a) Bare Zn, (b)

[PVBlm][TFSI]@Zn, and (c) [PVIPS][Zn(TFSI)<sub>2</sub>]@Zn.



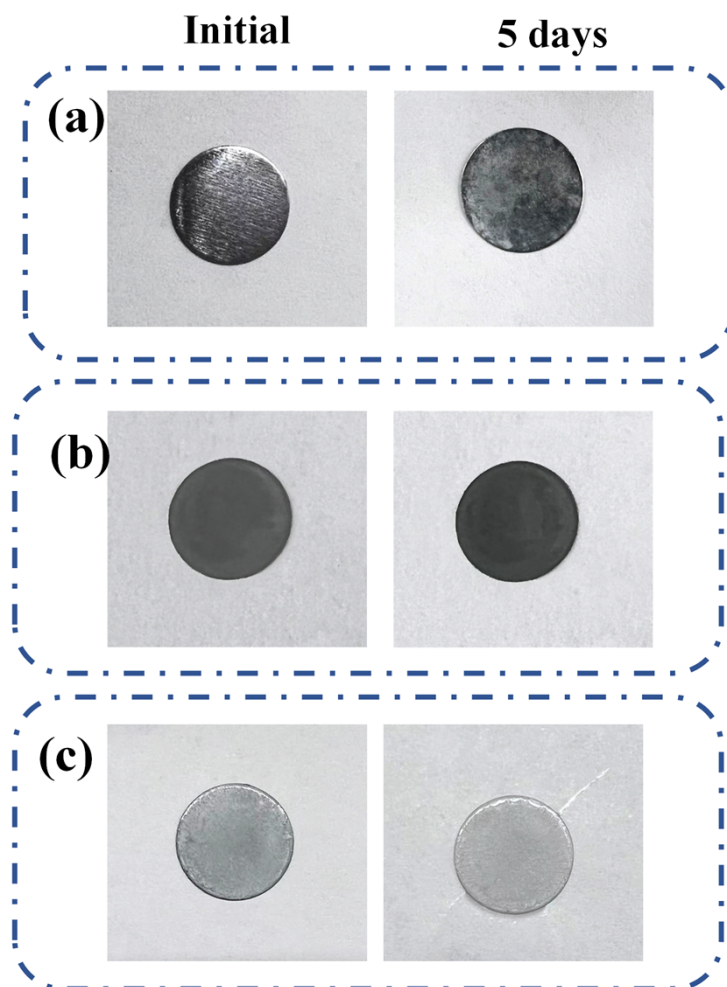

Figure S7. Photos of (a) bare Zn, (b) [PVBIm][TFSI]@Zn, and (c) [PVIPS][Zn(TFSI)<sub>2</sub>]@Zn soaked in 2M ZnSO<sub>4</sub> for 5 days at 25°C.

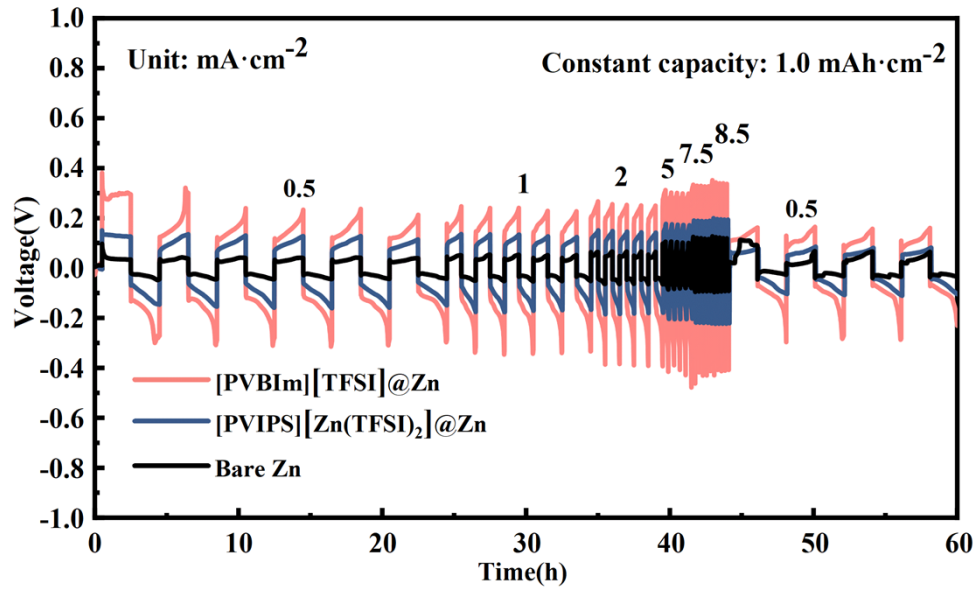

Figure S8. Rate performance of bare Zn, [PVBIm][TFSI]@Zn, and [PVIPS][Zn(TFSI)<sub>2</sub>]@Zn symmetrical cells at a fixed capacity of  $1.0\text{ mAh}\cdot\text{cm}^{-2}$ .

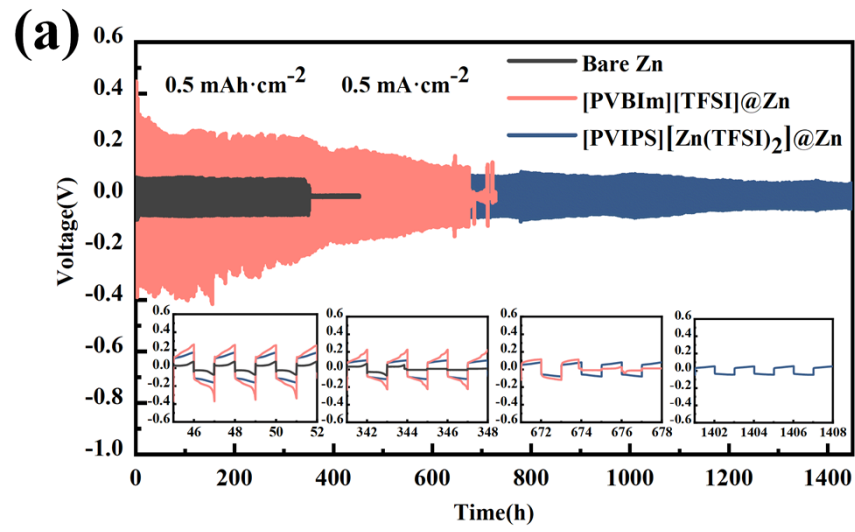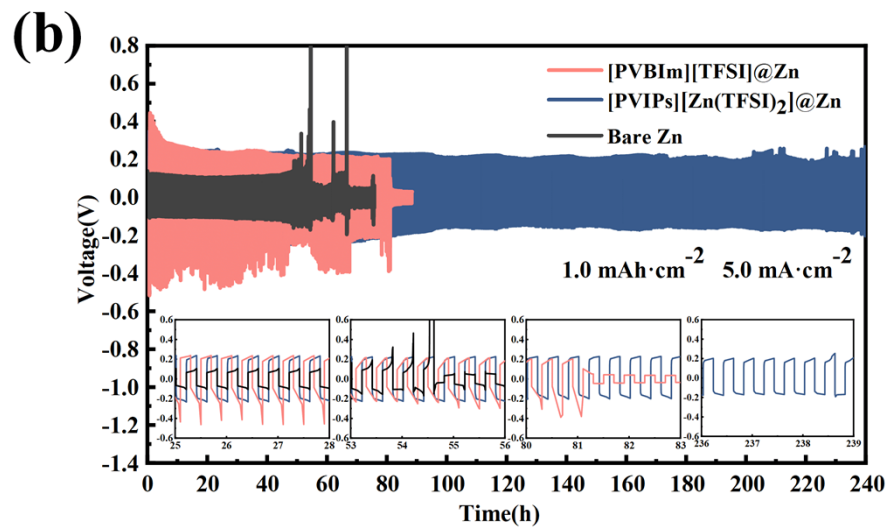

Figure S9 Galvanostatic cycling of bare Zn, [PVBIm][TFSI]@Zn, and [PVIPS][Zn(TFSI)<sub>2</sub>]@Zn symmetric cells at current densities of (a) 0.5 mA·cm<sup>-2</sup>/0.5 mAh·cm<sup>-2</sup> and (b) 5.0 mA·cm<sup>-2</sup>/1.0 mAh·cm<sup>-2</sup>.

### 3. Supplementary tables.

**Table S1.** Cycling performance of the Zn symmetrical cells with different SEIs.

| Composition of SEI                                                                    | Coulomb efficiency (%)            | Cycle life (h)                    | Reference |
|---------------------------------------------------------------------------------------|-----------------------------------|-----------------------------------|-----------|
| [PVBIIm][TFSI]                                                                        | 99.6 (0.5 mA·cm <sup>-2</sup> )   | 675 (0.5 mA·cm <sup>-2</sup> )    | This work |
| [PVIPS][Zn(TFSI) <sub>2</sub> ]                                                       | 98.0 (0.5 mA·cm <sup>-2</sup> )   | 1950 (1.0 mA·cm <sup>-2</sup> )   | This work |
| TMPMP-TMPTA-BMPTFSI IL gel                                                            | 96.6 (0.5 mA·cm <sup>-2</sup> )   | 1000 (0.1 mA·cm <sup>-2</sup> )   | 3         |
| Poly (ether ether ketone)                                                             | 98.0 (1.0 mA·cm <sup>-2</sup> )   | 500 (1.0 mA·cm <sup>-2</sup> )    | 4         |
| 1,3,5,9-Tetrathiophenylpyrene                                                         | 98.4 (0.885 mA·cm <sup>-2</sup> ) | 1000 (0.885 mA·cm <sup>-2</sup> ) | 5         |
| (LCNF)-MXene                                                                          | 98.9 (1.0 mA·cm <sup>-2</sup> )   | 800 (1.0 mA·cm <sup>-2</sup> )    | 6         |
| rich-cyano SEI                                                                        | 99.65 (1.0 mA·cm <sup>-2</sup> )  | 500 (1.0 mA·cm <sup>-2</sup> )    | 7         |
| acrylic-bonded stationary                                                             | 99.9 (1.0 mA·cm <sup>-2</sup> )   | 1000 (1.0 mA·cm <sup>-2</sup> )   | 8         |
| Nafion-Zn-X zeolite nanoparticles                                                     | 97.0 (1.0 mA·cm <sup>-2</sup> )   | 1000 (1.0 mA·cm <sup>-2</sup> )   | 9         |
| Zn(H <sub>2</sub> PO <sub>4</sub> ) <sub>2</sub>                                      | 99.4 (1.0 mA·cm <sup>-2</sup> )   | 800 (0.5 mA·cm <sup>-2</sup> )    | 10        |
| Zn <sub>5</sub> (OH) <sub>8</sub> (NO <sub>3</sub> ) <sub>2</sub> · 2H <sub>2</sub> O | 99.8 (0.5 mA·cm <sup>-2</sup> )   | 1200 (0.5 mA·cm <sup>-2</sup> )   | 11        |
| ATMP-Zr (AZ)                                                                          | 99.5 (1.0 mA·cm <sup>-2</sup> )   | 1800 (1.0 mA·cm <sup>-2</sup> )   | 12        |

## Reference

1. F. Lu, G. Li, Y. Yu, X. Gao, L. Zheng and Z. Chen, *Chemical Engineering Journal*, 2020, **384**, 123237.
2. G. Garg, G. S. Chauhan, R. Gupta and J. H. Ahn, *Journal of Colloid and Interface Science*, 2010, **344**, 90-96.
3. D. Lee, H.-I. Kim, W.-Y. Kim, S.-K. Cho, K. Baek, K. Jeong, D. B. Ahn, S. Park, S. J. Kang and S.-Y. Lee, *Advanced Functional Materials*, 2021, **31**, 2103850.
4. Q. Jian, Y. Wan, Y. Lin, M. Ni, M. Wu and T. Zhao, *ACS Applied Materials & Interfaces*, 2021, **13**, 52659-52669.
5. X. Qi, F. Xie, Y.-T. Xu, H. Xu, C.-L. Sun, S.-H. Wang, J.-Y. Hu and X.-F. Wang, *Chemical Engineering Journal*, 2023, **453**, 139963.
6. C. Liu, Z. Li, X. Zhang, W. Xu, W. Chen, K. Zhao, Y. Wang, S. Hong, Q. Wu, M.-C. Li and C. Mei, *Advanced Science*, 2022, **9**, 2202380.
7. H. Yan, C. Han, S. Li, J. Liu, J. Ren, S. Yang and B. Li, *Chemical Engineering Journal*, 2022, **442**, 136081.
8. C. Huang, W. Deng, X. Yuan, Y. Zhou, C. Li, J. Hu, M. Zhang, J. Zhu and R. Li, *ACS Applied Materials & Interfaces*, 2023, **15**, 2341-2350.
9. Y. Cui, Q. Zhao, X. Wu, X. Chen, J. Yang, Y. Wang, R. Qin, S. Ding, Y. Song, J. Wu, K. Yang, Z. Wang, Z. Mei, Z. Song, H. Wu, Z. Jiang, G. Qian, L. Yang and F. Pan, *Angewandte Chemie International Edition*, 2020, **59**, 16594-16601.
10. X. Zeng, J. Mao, J. Hao, J. Liu, S. Liu, Z. Wang, Y. Wang, S. Zhang, T. Zheng, J. Liu, P. Rao and Z. Guo, *Advanced Materials*, 2021, **33**, 2007416.
11. D. Li, L. Cao, T. Deng, S. Liu and C. Wang, *Angewandte Chemie International Edition*, 2021, **60**, 13035-13041.
12. J. Ren, C. Li, P. Li, S. Liu and L. Wang, *Chemical Engineering Journal*, 2023, **462**, 142270.
